# Supplementary material for: Early Reflections on Mphatlalatsane, a Maternal and Neonatal Quality Improvement Initiative Implemented During COVID-19 in South Africa
Source: PubMed Central journal article supplement (PMC9622289; doi:10.9745/ghsp-d-22-00022), 2022-10-31
Supplement: 22-00022-Odendaal-Supplement.pdf [file 22-00022-Odendaal-Supplement.pdf]

**Cite this article as:** Odendaal W, Goga A, Chetty T, et al. Early reflections on Mphatlalatsane, a maternal and neonatal quality improvement initiative implemented during COVID-19 in South Africa. *Glob Health Sci Pract.* 2022;10(5):e2200022. <https://doi.org/10.9745/GHSP-D-22-00022>

**Supplement Table S1. Extract from the Mphatlalatsane COVID-19 risk matrix at management level**

| <b>Aims</b>                                                                                       | <b>Key Areas</b>                                                                                                                                                            | <b>Specific strategies</b>                                                                                                                                                                                                                       |
|---------------------------------------------------------------------------------------------------|-----------------------------------------------------------------------------------------------------------------------------------------------------------------------------|--------------------------------------------------------------------------------------------------------------------------------------------------------------------------------------------------------------------------------------------------|
| To provide uninterrupted maternal and newborn health services, with a focus on maternity services | <ol style="list-style-type: none"> <li>1. Effective leadership and management</li> <li>2. Prevent and manage health care worker infection and emotional distress</li> </ol> | <ul style="list-style-type: none"> <li>• Promote visible, decisive management</li> <li>• Ensure effective communication with health care workers</li> <li>• Provide reliable essential supplies (e.g., personal protective equipment)</li> </ul> |

**Supplement Table S2. Extract from the Mphatlalatsane COVID-19 risk matrix at the health care worker level, using family planning services as an example**

| <b>Point in the continuum of Maternal and Newborn Health Care</b> | <b>Risks of COVID-19 exposure</b> | <b>Risks to continuity of care and quality</b> |                                                 |                |
|-------------------------------------------------------------------|-----------------------------------|------------------------------------------------|-------------------------------------------------|----------------|
|                                                                   |                                   | <b>Contraceptive provision</b>                 | <b>Pregnancy and fetus</b>                      | <b>Newborn</b> |
| Family planning services                                          | Exposure in queues                | Low uptake of family planning services         | Adolescent, unwanted, and high-risk pregnancies | Prematurity    |
